## Clinical outcomes after upgrade to resynchronization therapy: a propensity-score matched comparative analysis

Brandao M.; Goncalves Almeida J.; Fonseca P.; Rosas F.; Santos E.; Ribeiro J.; Oliveira M.; Goncalves H.; Fontes-Carvalho R.; Primo J.

Hospital Center of Vila Nova de Gaia/Espinho, Vila Nova de Gaia, Portugal

**Funding Acknowledgements:** Type of funding sources: None.

**BACKGROUND:** Upgrade to resynchronization therapy (CRT) is common practice in Europe. However, guideline recommendations are discordant and randomized trials are lacking. Previous studies have shown worse outcomes in upgraded patients.

**AIM:** To compare clinical outcomes in a cohort of patients receiving de novo or upgrade to CRT.

**METHODS:** Single-center retrospective study of consecutive patients submitted to CRT implantation (2007-2018). Major adverse cardiac events (MACE) included heart failure hospitalization or all-cause mortality. Clinical response was defined as NYHA class improvement without MACE in the 1st year of follow-up (FU). Left ventricle end-systolic volume reduction of >15% designated echocardiographic (echo) response. Survival analysis with Kaplan-Meier method and Log-rank test was performed. Propensity-score matching (PSM) analysis was performed to adjust for possible confounder variables.

**RESULTS:** 295 CRT patients (70.5% male, mean age  $67 \pm 11$  years, 72.5% non-ischemic cardiomyopathy, 54.6% implanted with CRT-D) were included. Fifty-six patients (19%) underwent an upgrade: 43 (78.2%) from a pacemaker and 12 (21.8%) from a defibrillator device. Indications for upgrade were mainly pacemaker dependency or pacing-induced LV dysfunction (76.6%) and de novo left bundle branch block (23.4%).

Upgraded patients were older ( $70$  vs  $66$  years,  $p=.034$ ), with larger baseline QRS ( $185 \pm 25$  vs  $163 \pm 30$  ms,  $p<.001$ ) and higher rates of atrial fibrillation (58.2% vs 26.7%,  $p<.001$ ), coronary artery disease (41.8% vs 26.2%,  $p=.033$ ), moderate to severe valve disease (42.9% vs 22.6%,  $p=.003$ ) and chronic kidney disease (36.4% vs 18.7%,  $p=.008$ ). Upgraded patients more frequently received CRT-P (71.4% vs 39.3%,  $p<.001$ ). CRT-D were more often implanted for secondary prevention (53.3% vs 20.2%,  $p=.011$ ) in the upgrade group. There were no differences in procedural complications, clinical (59.3 vs 62.6%,  $p=.765$ ) or echo (72.2% vs 71.9%,  $p=.970$ ) response rates. During a median FU of  $3 \pm 5$  years, all-cause mortality was similar among groups (Log-rank test,  $p=.688$ ). MACE occurred more frequently in the upgrade group (Log-rank test,  $p=.025$ ). No differences emerged in lead complications (8.9% vs 8.4%,  $p=.892$ ) or device infection (1.8% vs 2.9%,  $p=.986$ ).

PSM analysis identified 106 matched pairs (56 upgrade/50 de novo patients), without baseline statistical differences. All-cause mortality (Log-rank test,  $p=.555$ ) and MACE (Log-rank test,  $p=.574$ ) were comparable between groups.

**CONCLUSION:** In this cohort, upgrade to CRT was comparable to de novo implantation in terms of clinical and echo response. Moreover, upgrade to CRT was not associated with higher complication rates. All-cause mortality and MACE were similar between groups.
